# Supplementary material for: Pilot feasibility study of a digital technology approach to the systematic electronic capture of parent-reported data on cognitive and language development in children aged 2 years
Source: HighWire-hosted journal article supplement (doi:10.1136/bmjhci-2023-100781), 2023-06-01
Supplement: bmjhci-2023-100781supp004_data_supplement.pdf [file bmjhci-2023-100781supp004_data_supplement.pdf]

## Thank you for registering for the ePARCA-R study (6-Month Notification)

**D** donotreply@openclinica.io      ...

Wed 07/07/2021 08:00  
To:

\*\*\*\*\*

This email originates from outside Imperial. Do not click on links and attachments unless you recognise the sender.  
If you trust the sender, add them to your safe senders list  
<https://spam.ic.ac.uk/SpamConsole/Senders.aspx> to disable email stamping for this address.  
\*\*\*\*\*

Dear Child001  
Thanks for joining ePARCA-R! Click <https://www.imperial.ac.uk/neonatal-data-analysis-unit/service-improvement-studies/eparca-r-/parent-information/> to review information and notify us of changes in your contact details  
The ePARCA-R team

[Reply](#) | [Forward](#)

## Thank you for registering for the ePARCA-R study (12-Month Notification)

**D** donotreply@openclinica.io      ...

Thu 06/01/2022 07:00  
To:

\*\*\*\*\*

This email originates from outside Imperial. Do not click on links and attachments unless you recognise the sender.  
If you trust the sender, add them to your safe senders list  
<https://spam.ic.ac.uk/SpamConsole/Senders.aspx> to disable email stamping for this address.  
\*\*\*\*\*

Dear Child001  
Thanks for joining ePARCA-R! Click <https://www.imperial.ac.uk/neonatal-data-analysis-unit/service-improvement-studies/eparca-r-/parent-information/> to review information and notify us of changes in your contact details  
The ePARCA-R team

[Reply](#) | [Forward](#)

## Thank you for registering for the ePARCA-R study (18-Month Notification)

**D** donotreply@openclinica.io      ...

Wed 07/07/2021 08:00  
To:

\*\*\*\*\*

This email originates from outside Imperial. Do not click on links and attachments unless you recognise the sender.  
If you trust the sender, add them to your safe senders list  
<https://spam.ic.ac.uk/SpamConsole/Senders.aspx> to disable email stamping for this address.  
\*\*\*\*\*

Dear Child003  
Thanks for joining ePARCA-R! Click <https://www.imperial.ac.uk/neonatal-data-analysis-unit/service-improvement-studies/eparca-r-/parent-information/> to review information and notify us of changes in your contact details  
The ePARCA-R team

[Reply](#) | [Forward](#)

## Please remember to complete the ePARCA-R questionnaire

**D** donotreply@openclinica.io      ...

Wed 07/07/2021 06:00  
To:

\*\*\*\*\*

This email originates from outside Imperial. Do not click on links and attachments unless you recognise the sender.  
If you trust the sender, add them to your safe senders list  
<https://spam.ic.ac.uk/SpamConsole/Senders.aspx> to disable email stamping for this address.  
\*\*\*\*\*

Dear Child006  
Last reminder! There's only 2 weeks left to fill in the ePARCA-R questionnaire  
<https://eparcartest.mytrial.me> for accurate results.  
Access Code: dE2PE4Uff  
The ePARCA-R team

[Reply](#) | [Forward](#)
