# Supplementary material for: Pilot feasibility study of a digital technology approach to the systematic electronic capture of parent-reported data on cognitive and language development in children aged 2 years
Source: HighWire-hosted journal article supplement (doi:10.1136/bmjhci-2023-100781), 2023-06-01
Supplement: bmjhci-2023-100781supp005_data_supplement.pdf [file bmjhci-2023-100781supp005_data_supplement.pdf]

You're in review-only mode.

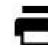

## 4-005: ePARCA-R Questionnaire

### Date of assessment

To obtain ePARCA-R standard scores, enter the date of ePARCA-R assessment. Child's age or corrected age (if the child was born preterm) will be calculated based on the entered date of assessment. Percentiles are only calculated for children aged between 23 months 16 days and 27 months 15 days at the time of assessment.

yyyy-mm-dd

Your child has a non-verbal cognitive scale score of **NaN**, and a standard score of . This is on the percentile. This means that % of children in the general population have scores equal to or less than your child's score.

Your child has a language scale score of **0**, and a standard score of . This is on the percentile. This means that % of children in the general population have scores equal to or less than your child's score.

**Please Note: This will be your last chance to print a copy of your results. You can do this by accessing your ePARCA-R Questionnaire on a computer/laptop.**

You're in review-only mode.

[← Back](#)[Close](#)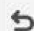[Return to Beginning](#)[Go to End](#)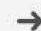

Powered by OpenClinica
